# Supplementary material for: Fatty acid ionic liquids as environmentally friendly lubricants for low friction and wear
Source: Royal Society of Chemistry journal article supplement (doi:10.1039/c5ra25001c), 2016-01-01
Supplement: c5ra25001c1.pdf [file c5ra25001c1.pdf]

## Supporting Information

# Fatty Acid Ionic Liquids as Environmentally Friendly Lubricants for Low Friction and Wear

*Rashi Gusain<sup>1,2</sup> and Om P. Khatri<sup>1,2\*</sup>*

<sup>1</sup> Chemical Science Division, CSIR - Indian Institute of Petroleum, Dehradun – 248005, India

<sup>2</sup> Academy of Scientific and Innovative Research (AcSIR), New Delhi, India

Figure S1

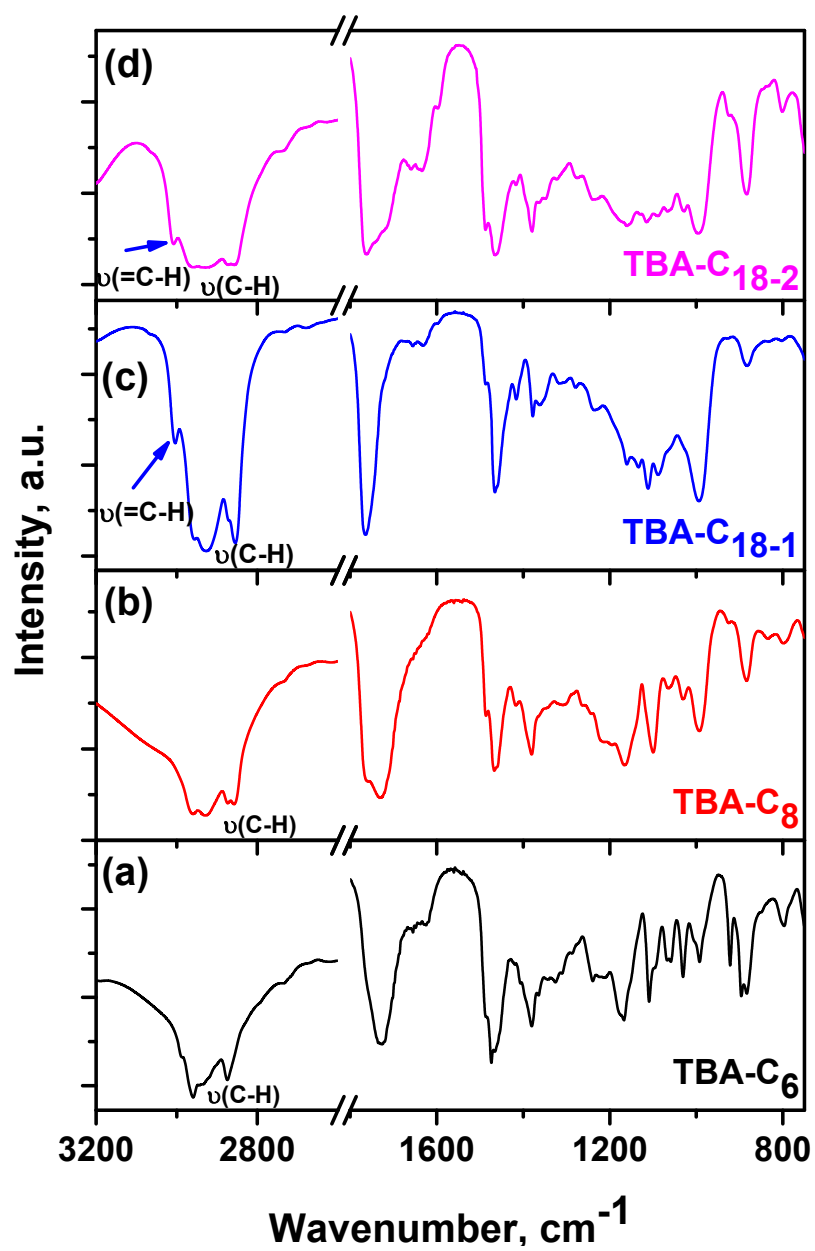

**Figure S1.** FTIR spectra of (a) TBA-C<sub>6</sub>, (b) TBA-C<sub>8</sub>, (c) TBA-C<sub>18-1</sub> and (d) TBA-C<sub>18-2</sub> ionic liquids.

**Table 1:**  $^1\text{H}$  NMR shifts ( $\delta$ , ppm, 500 MHz) for fatty acids ionic liquids

| Ionic Liquids         | H <sub>a</sub> , ppm | H <sub>b</sub> , ppm | H <sub>c</sub> and H <sub>f</sub> , ppm | H <sub>d</sub> , ppm | H <sub>e</sub> , ppm | H <sub>g</sub> , ppm | H <sub>h</sub> and H <sub>i</sub> , ppm | H <sub>i</sub> , ppm | H <sub>j</sub> , ppm | H <sub>k</sub> , ppm |
|-----------------------|----------------------|----------------------|-----------------------------------------|----------------------|----------------------|----------------------|-----------------------------------------|----------------------|----------------------|----------------------|
| TBA-C <sub>6</sub>    | 3.24-3.28t,<br>8H    | 1.47-1.49m,<br>8H    | 1.17-1.36m,<br>12H                      | 0.86-1.00t,<br>12H   | 0.75-0.85t,<br>3H    | -                    | -                                       | -                    | 1.50-1.59m,<br>2H    | 2.23-2.26t,<br>2H    |
| TBA-C <sub>8</sub>    | 3.33-3.36t,<br>8H    | 1.57-1.61m,<br>8H    | 1.25-1.48m,<br>16H                      | 0.98-1.01t,<br>12H   | 0.86-0.88t,<br>3H    | -                    | -                                       | -                    | 1.64-1.70m,<br>2H    | 2.34-2.36t,<br>2H    |
| TBA-C <sub>18-1</sub> | 3.34-3.37t,<br>8H    | 1.62-1.68m,<br>8H    | 1.27-1.35m,<br>24H                      | 0.87-0.89t,<br>12H   | 0.87-0.89t,<br>3H    | 1.37-1.41m,<br>4H    | 2.72-2.81m,<br>4H                       | 5.22-5.36m,<br>2H    | 1.99-2.03q,<br>2H    | 2.34-2.37t,<br>2H    |
| TBA-C <sub>18-2</sub> | 3.32-3.35t,<br>8H    | 1.61-1.64m,<br>8H    | 1.26-1.30m,<br>18H                      | 0.98-1.01t,<br>12H   | 0.86-0.88t,<br>3H    | 1.41-1.48m,<br>4H    | 2.61-2.68m,<br>6H                       | 5.30-5.42m,<br>4H    | 1.94-2.08q,<br>2H    | 2.34-2.37t,<br>2H    |

**Figure S2**

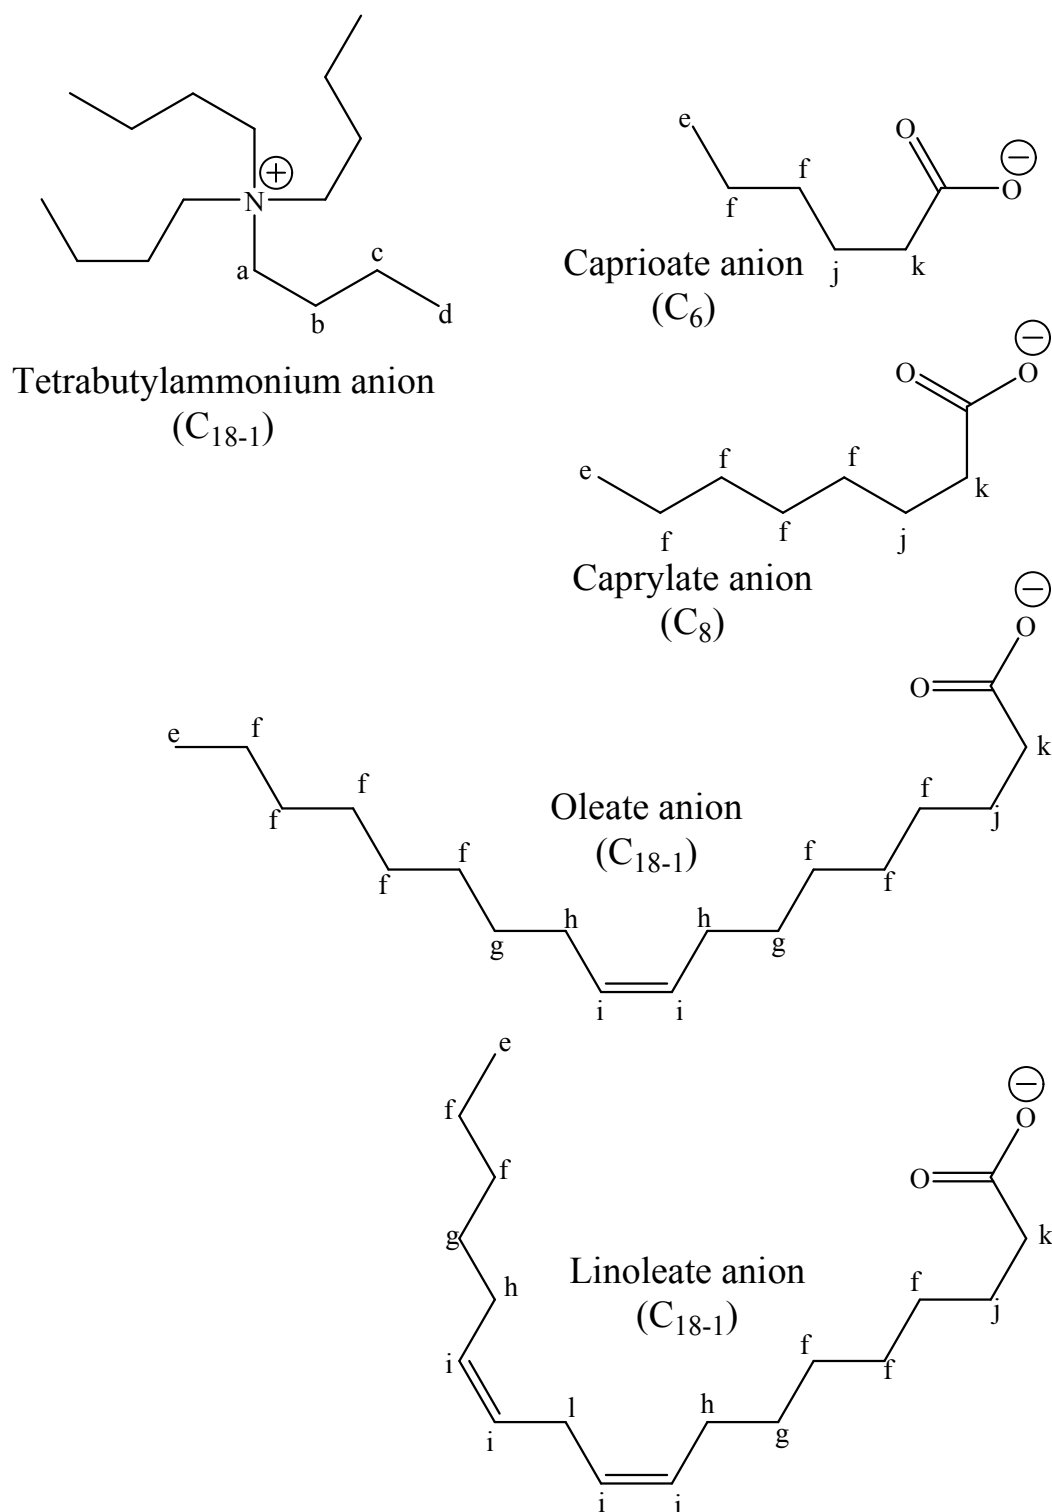

**Figure S2.** Chemical structure of tetrabutylammonium (TBA) cation and fatty acid anions: caproate ( $\text{C}_6$ ), caprylate ( $\text{C}_8$ ), oleate ( $\text{C}_{18-1}$ ) and linoleate ( $\text{C}_{18-2}$ ) along with highlighted positions based on  $^1\text{H}$  NMR.

Figure S3

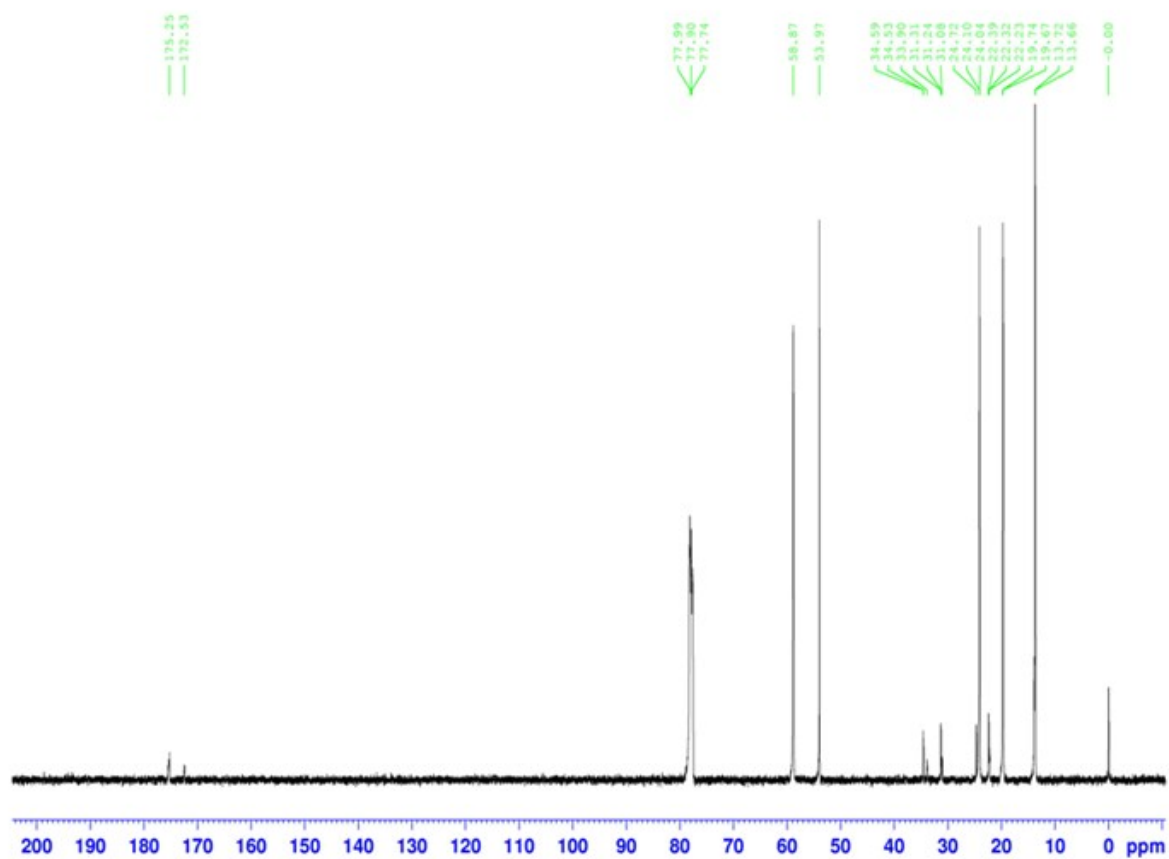

Figure S3.  $^{13}\text{C}$  NMR spectrum of tetrabutylammonium caproate (TBA- $\text{C}_6$ ) ionic liquid

Figure S4

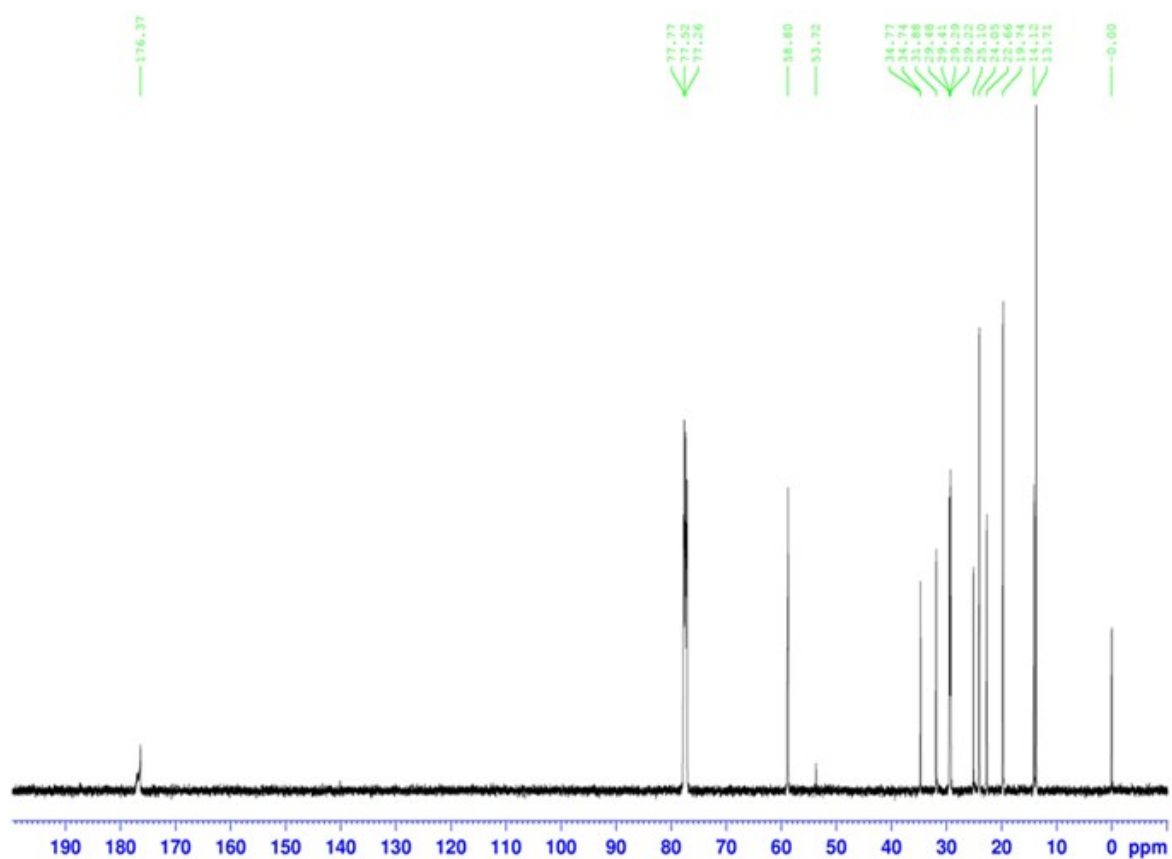

Figure S4.  $^{13}\text{C}$  NMR spectrum of tetrabutylammonium caprylate (TBA- $\text{C}_8$ ) ionic liquid

Figure S5

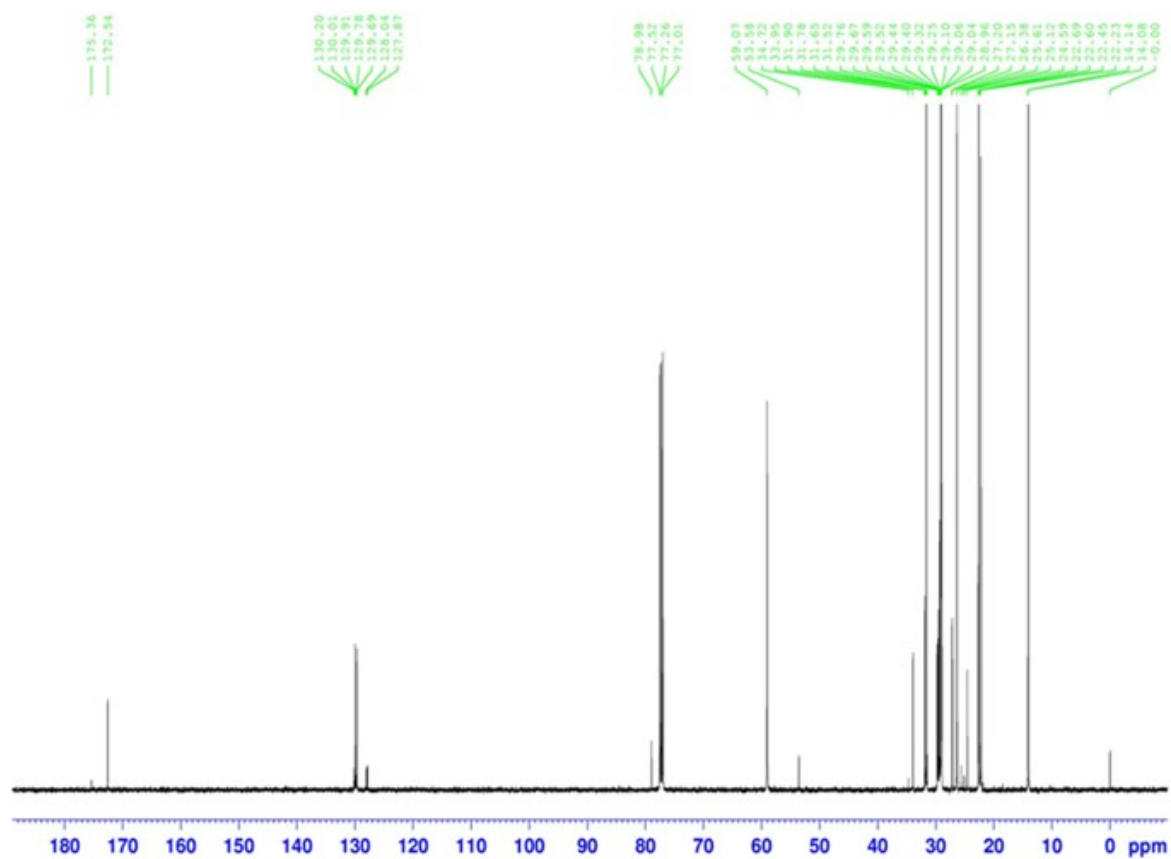

Figure S5.  $^{13}\text{C}$  NMR spectrum of tetrabutylammonium oleate (TBA- $\text{C}_{18-1}$ ) ionic liquid

Figure S6

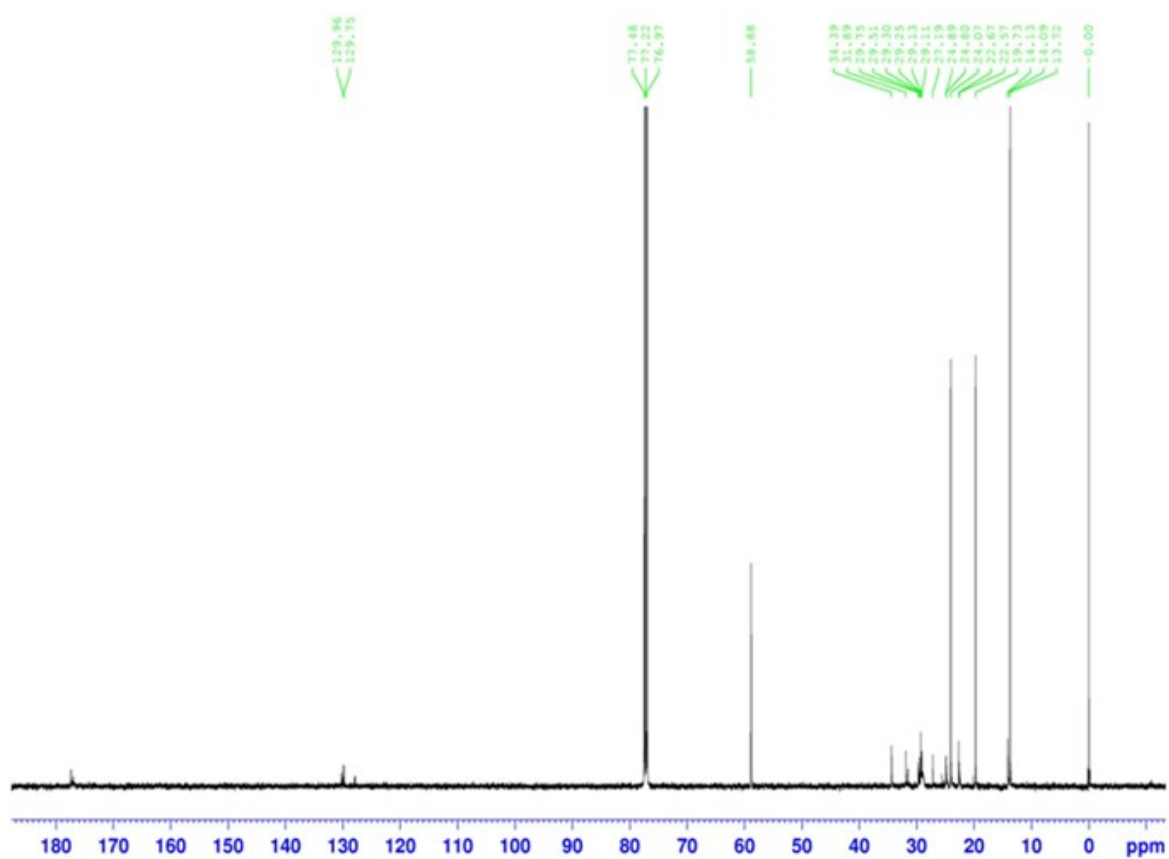

Figure S6.  $^{13}\text{C}$  NMR spectrum of tetrabutylammonium linoleate (TBA- $\text{C}_{18-2}$ ) ionic liquid
